# Supplementary material for: Membrane determinants for the passive translocation of analytes through droplet interface bilayers
Source: Royal Society of Chemistry journal article supplement (doi:10.1039/d0sm00667j), 2020-01-01
Supplement: d0sm00667j1.pdf [file d0sm00667j1.pdf]

# Membrane determinants for the passive translocation of analytes through droplet interface bilayers

Vincent Faugeras<sup>1</sup>, Olivier Duclos<sup>2</sup>, Didier Bazile<sup>3</sup>, Abdou Rachid Thiam<sup>1</sup>

<sup>1</sup>Laboratoire de Physique de l'École Normale Supérieure, ENS, Université PSL, CNRS, Paris, France

<sup>2</sup>Integrated Drug Discovery Platform. Sanofi R&D, Chilly-Mazarin, France.

<sup>3</sup>Pharmaceutics Development Platform. Sanofi R&D, Gentilly, France,  
(correspondence to [thiam@ens.fr](mailto:thiam@ens.fr))

## Supplementary figures

**a**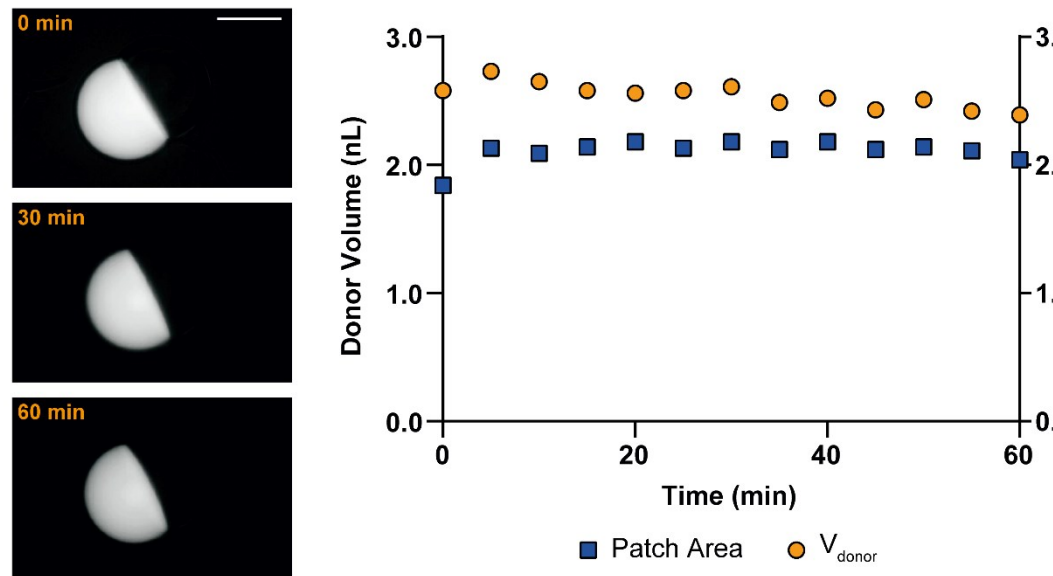**b**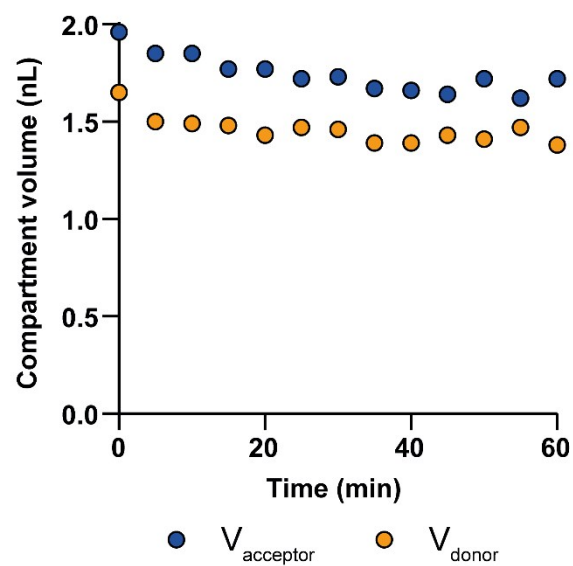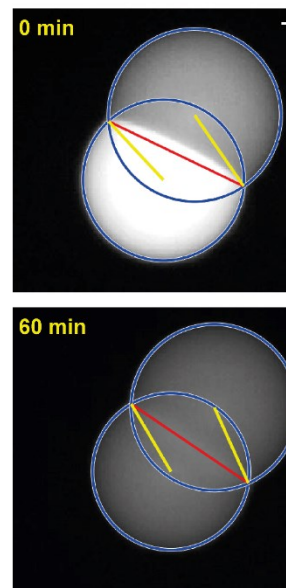**Figure S1:**

**(a)** Control experiments show that droplet (yellow square) and patch (blue square) sizes do not significantly vary during the course of the permeation experiment. The example case shown is for carboxyfluorescein in DOPE DIBs and glyceryl trioctanoate. Scale bar, 100 $\mu$ m. **(b)** Both donor and acceptor droplets are shown in the case of fluorescein. Their sizes during permeation do not significantly change. Right, image illustrating that no significant change in size (blue circles) and contact angle (given by yellow and red lines) happens during the permeation of fluorescein. Scale bar, 50 $\mu$ m.

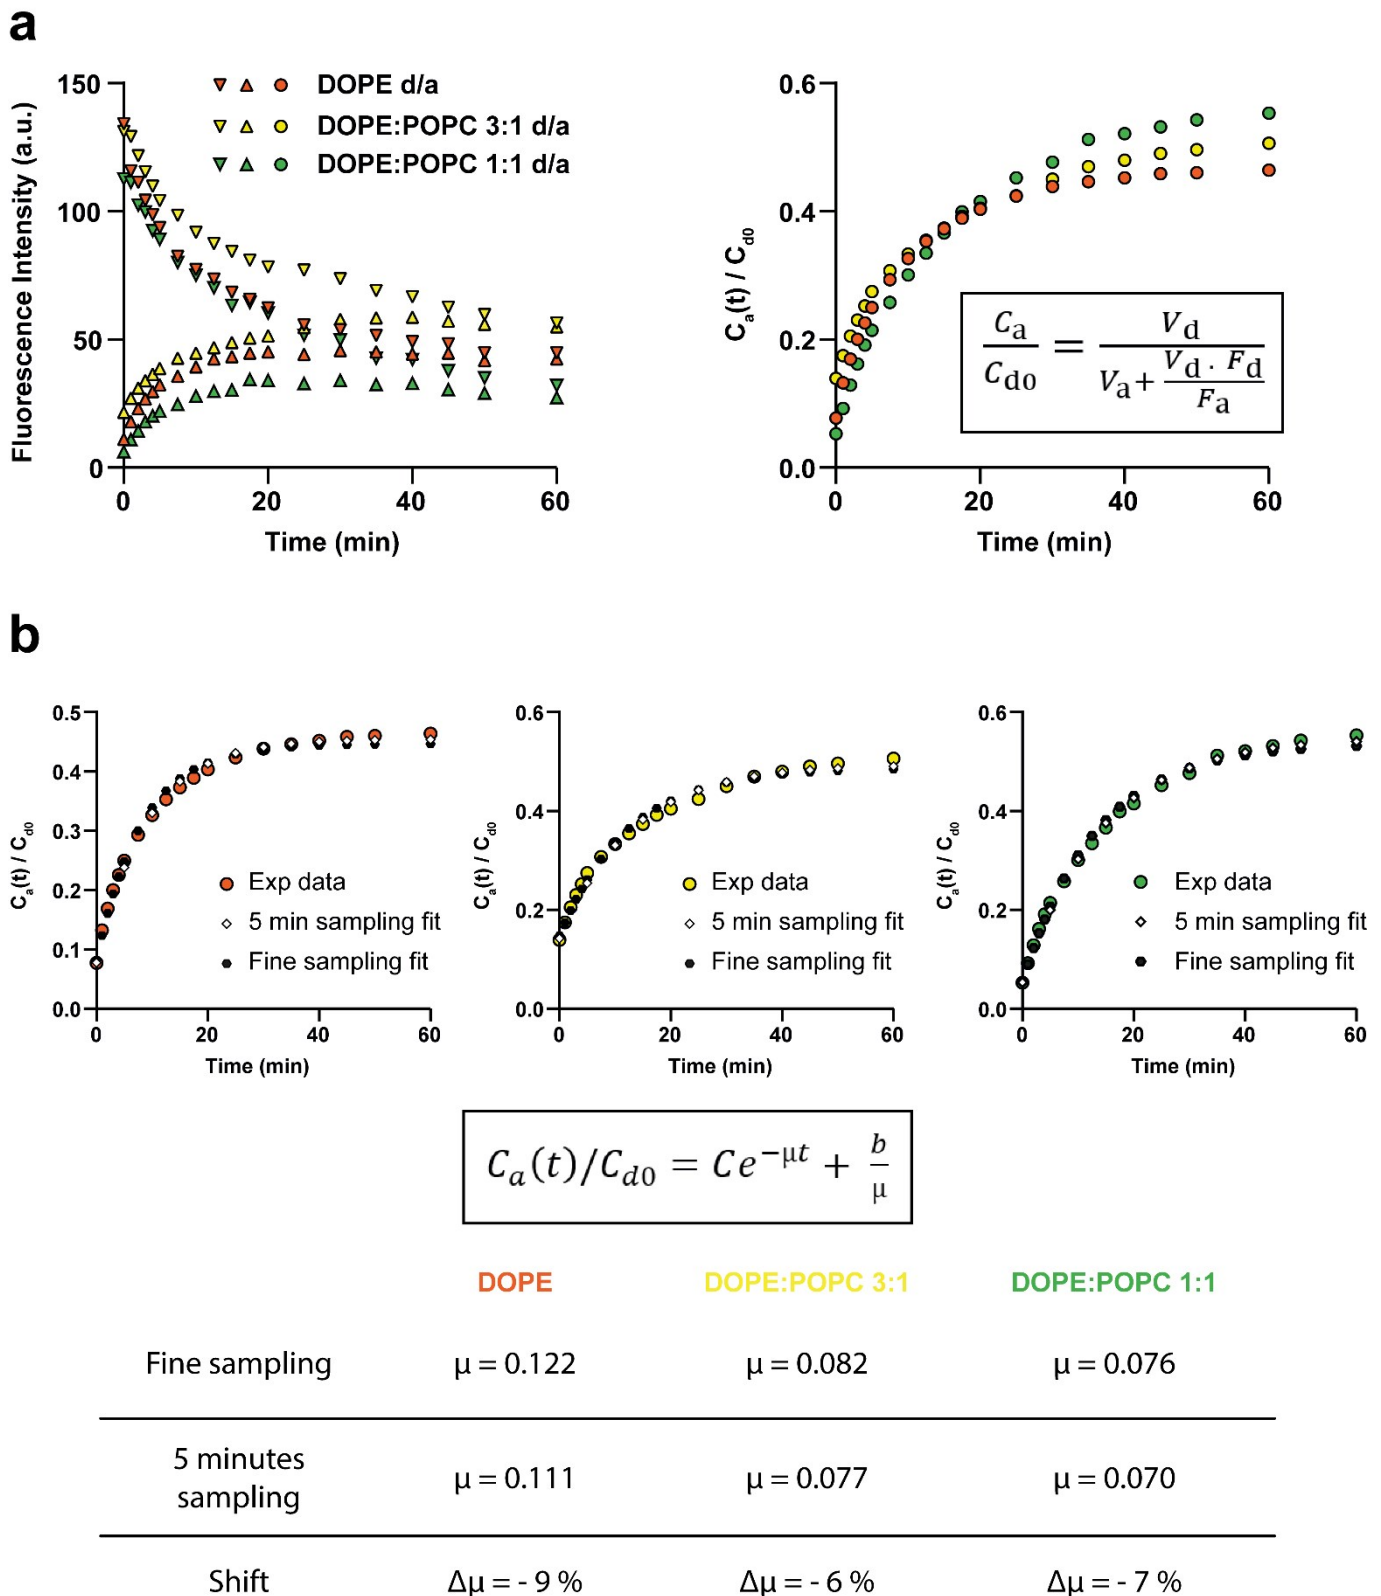

**Figure S2:**

(a) A representative example of the fluorescence intensity in the donor and acceptor droplets over time is shown for the three following phospholipid composition: DOPE, DOPE:POPC 3:1 and DOPE:POPC 1:1. The subsequent acceptor concentration,  $C_a/C_{d0}$  as a function of time is shown. (b) Comparison of

fit with fine sampling (1 minute time span for the first 5 minutes, 2.5 minutes time span from 5 to 20 minutes, 5 minutes time span from 20 minutes to 50 minutes, 10 minutes time span from 50 to 60 minutes) and fit with 5 minutes sampling (5 minutes time span for the entire experiment duration), for the three studied compositions (Bottom table) Parameters obtained from the experimental fits using the two different sampling show close values with a similar shift.

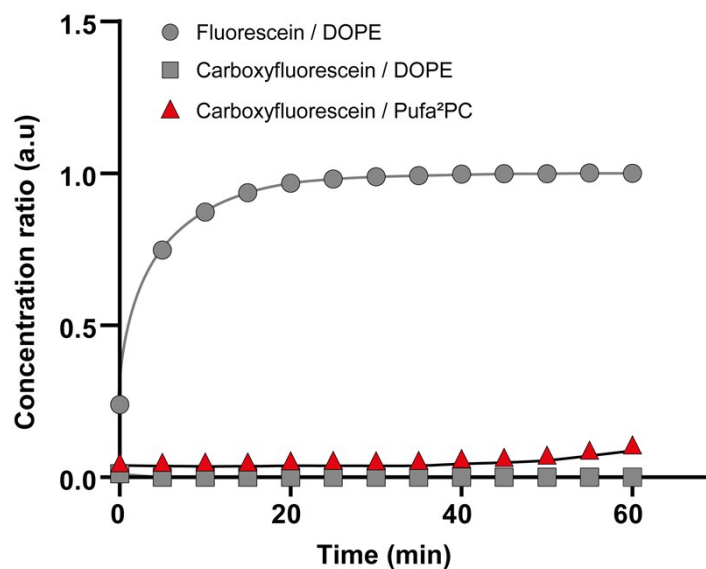

**Figure S3:**

Comparison of permeation kinetics for carboxyfluorescein through glyceryl trioctanoate DOPE and Pufa<sup>2</sup>PC DIB bilayers.

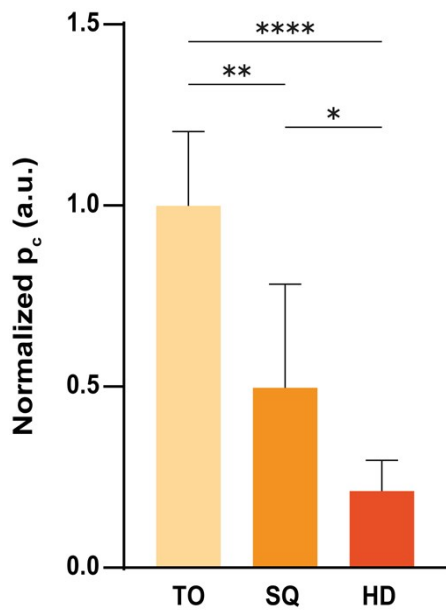

**Figure S4:**

Measurement of the monolayer tensions at a water/oil interface stabilized with phospholipids.

**(a)** Schematic of the pendant drop method of the Teclis apparatus. Adsorption of the phospholipids at the water/oil interface and decrease in monolayer tension obtained from droplet shape analysis.

**(b)** Surface tension, fitted surface tension, volume and area as a function of time. Exponential fit enables to get the equilibrium value of surface tension  $\gamma_{m0}$ .

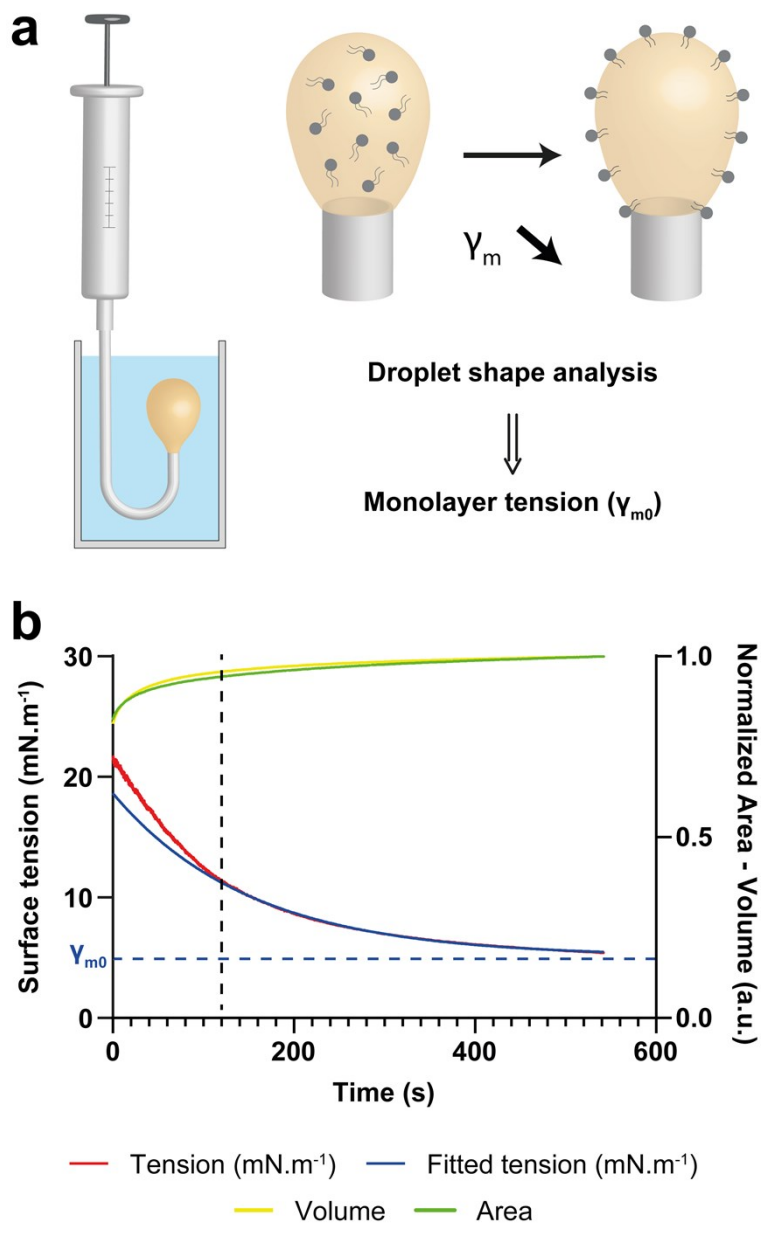

**Figure S5:**

Comparison of permeability through DOPE DIBs made of various oil, Glyceryl Trioctanoate (TO), Squalene (SQ), and Hexadecane (HD) (mean value, error bars represent the SD). \* indicates  $p < 0.05$ , \*\* indicates  $p < 0.01$ , \*\*\*\* indicates  $p < 0.0001$ .
